# Supplementary material for: Mother–child transmission of epigenetic information by tunable polymorphic imprinting
Source: PubMed Central journal article supplement — Proc Natl Acad Sci U S A. 2018 Dec 3;115(51):E11970–7. doi: 10.1073/pnas.1815005115 (PMC6304996; doi:10.1073/pnas.1815005115), 2018-12-03
Supplement: pnas.1815005115.sapp.pdf [file pnas.1815005115.sapp.pdf]

## Supplementary Information for

### **Mother-child transmission of epigenetic information by tunable polymorphic imprinting**

Brittany L. Carpenter, Wanding Zhou, Zachary Madaj, Ashley K. DeWitt, Jason P. Ross, Kirsten Grønbaek, Gangning Liang, Susan J. Clark, Peter L. Molloy, and Peter A. Jones.

Peter A. Jones  
Email: [Peter.Jones@vai.org](mailto:Peter.Jones@vai.org)

#### **This PDF file includes:**

Figs. S1 to S7  
Tables S1 and S2

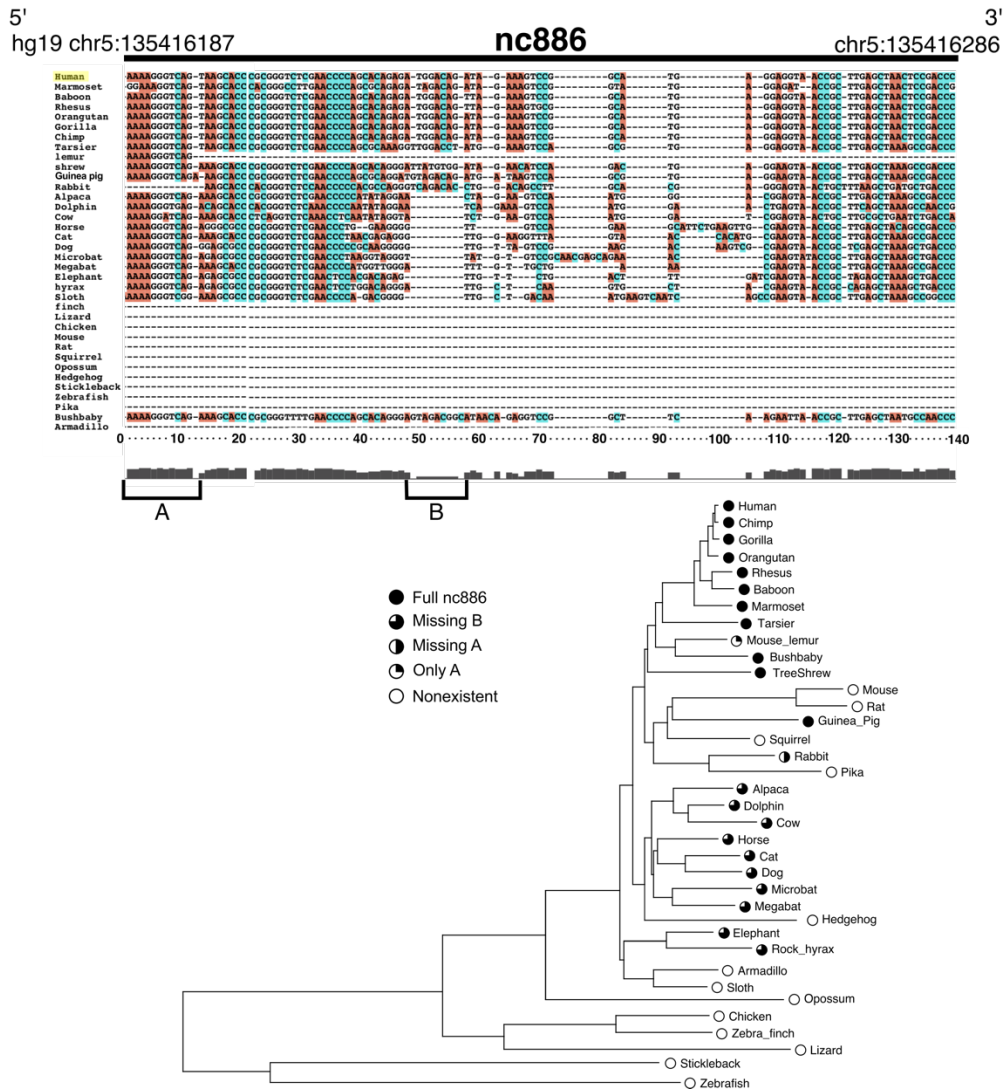

**Fig. S1. Species alignment for nc886.** Sequence alignment of the nc886 locus and a pruned tree from the UCSC 46-vertebrate species tree.

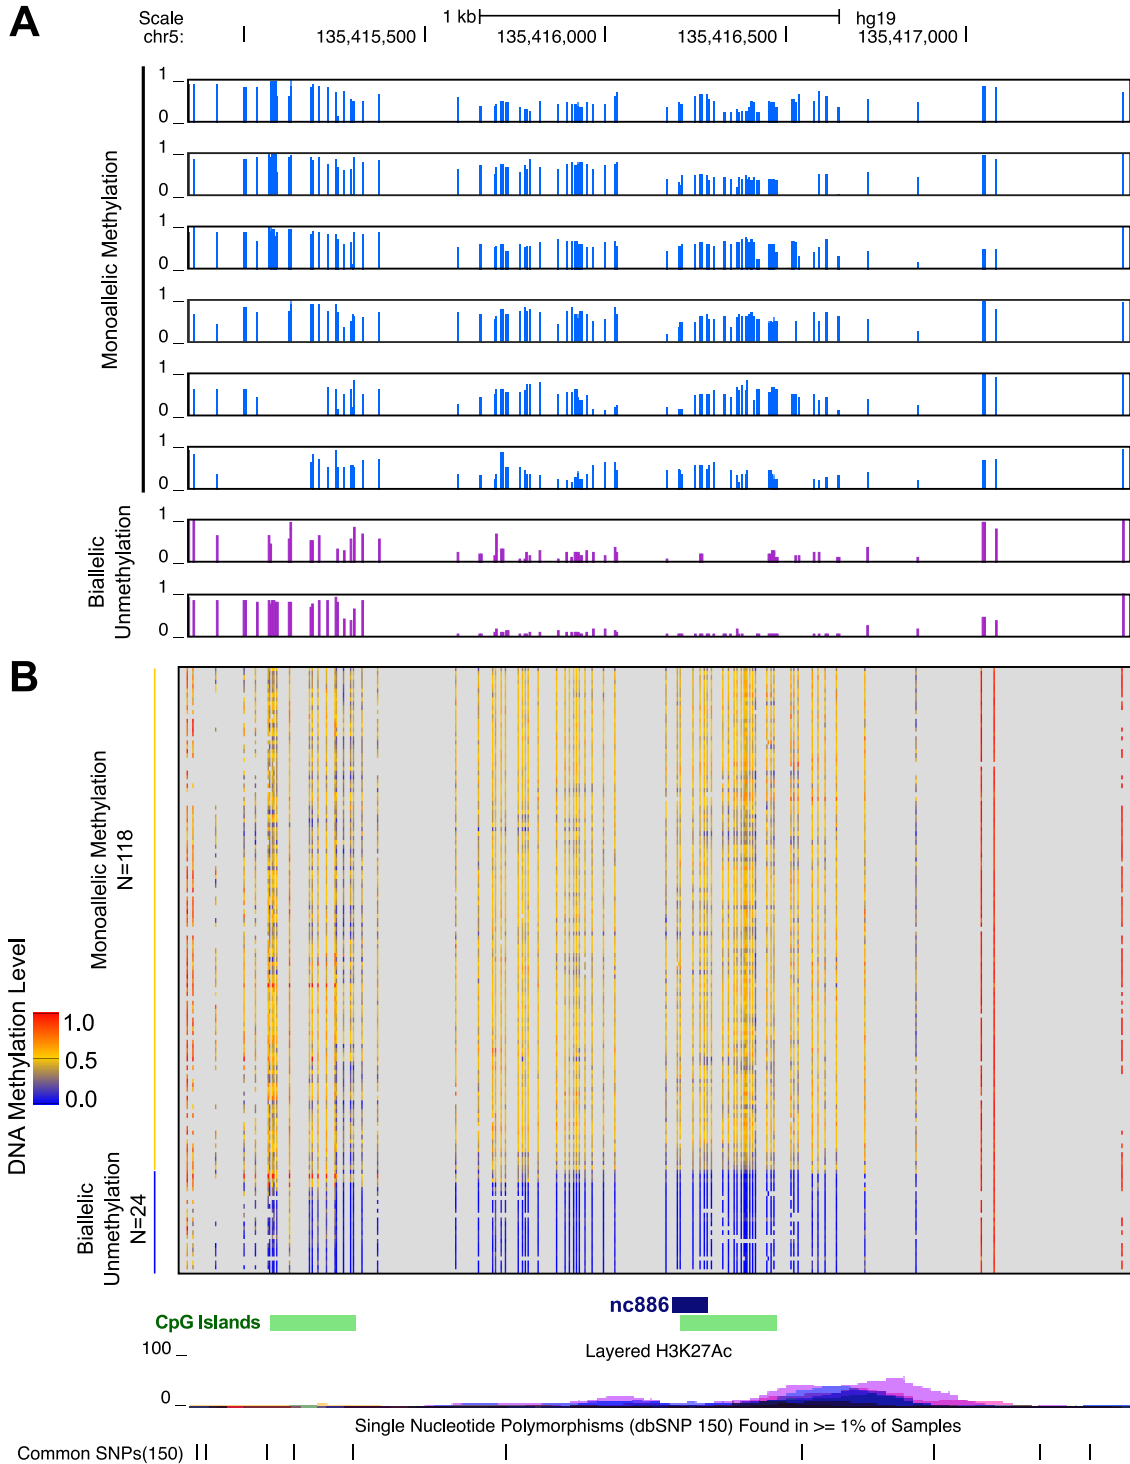

**Fig. S2. Whole genome bisulfite sequencing for the nc886 DMR.** The nc886 DMR was defined as 1979 bps using WGBS data for individuals from TCGA (A) and BLUEPRINT (B) data sets.

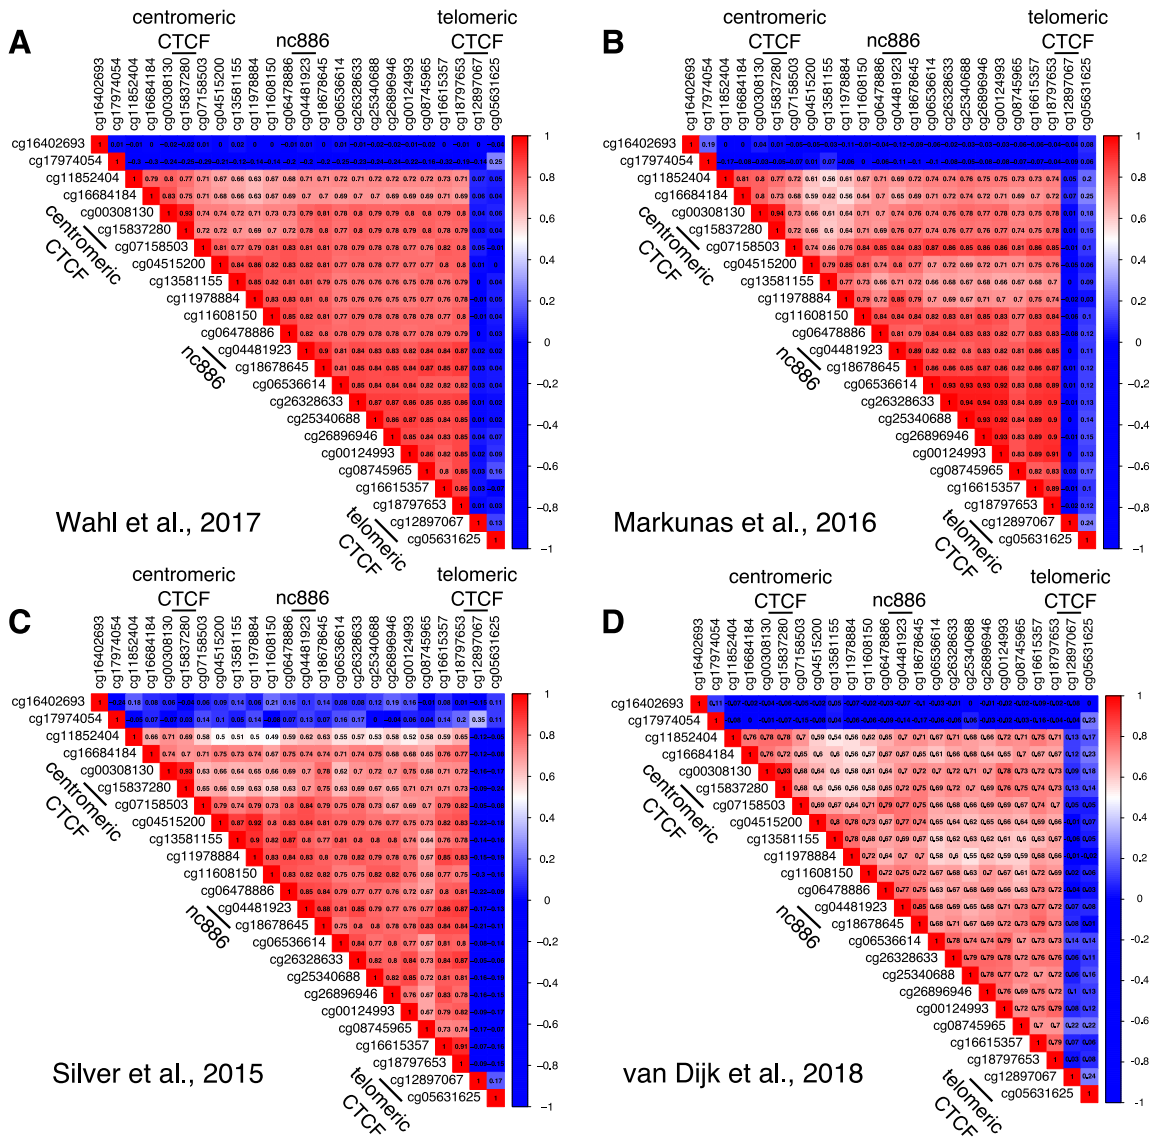

**Fig. S3. Correlation of beta values across the nc886 DMR.** Correlograms were generated based on beta values across the nc886 DMR and flanking invariable CpG sites. The data are from four independent data sets that were analyzed in this study.

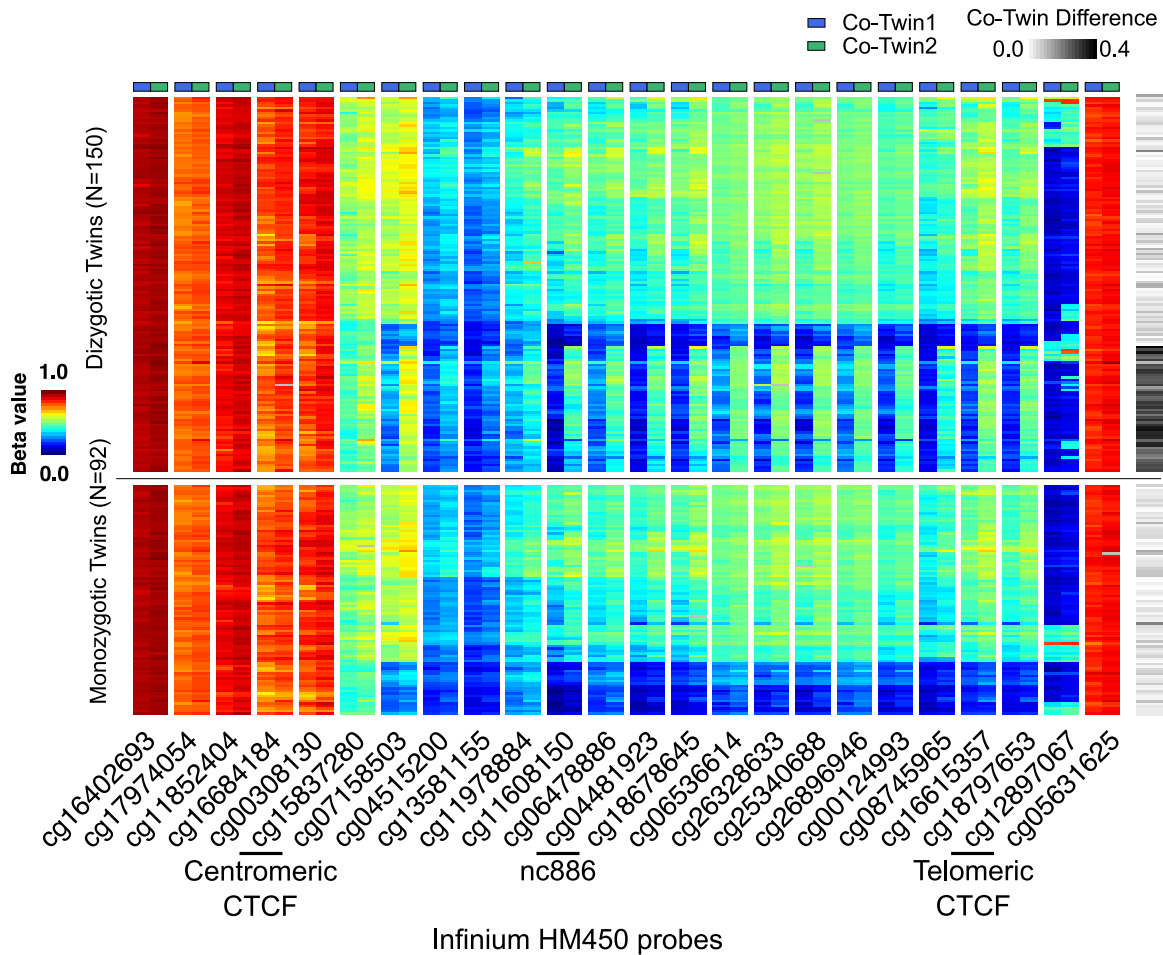

**Fig. S4. Monozygotic, but not dizygotic, twins are concordant for DNA methylation across the nc886 DMR.** HM450 data was analyzed from adipose tissue of monozygotic (bottom panel) and dizygotic (top panel) twins. Heat map displays beta values for co-Twin1 and co-Twin2 at each CpG probe across the DMR. Difference in beta values between co-twins for cg04481923 (nc886) are represented on the right.

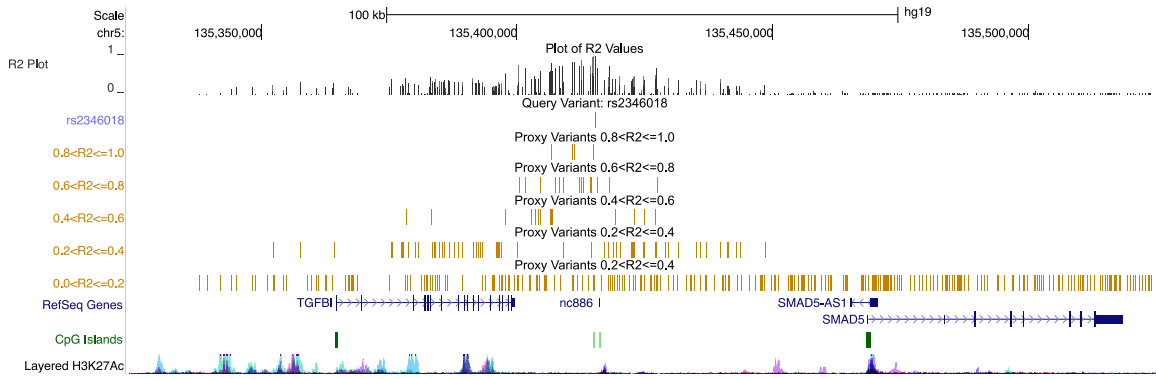

**Fig. S5. The local haplotype for nc886.** LDlink was used to calculate R2 values between variant rs2346018 and surrounding variants. R2 values are displayed for all populations from the 1000 genomes project. Local haplotypes range in size from 5 kb – 35 kb from rs2346018 depending on the population.

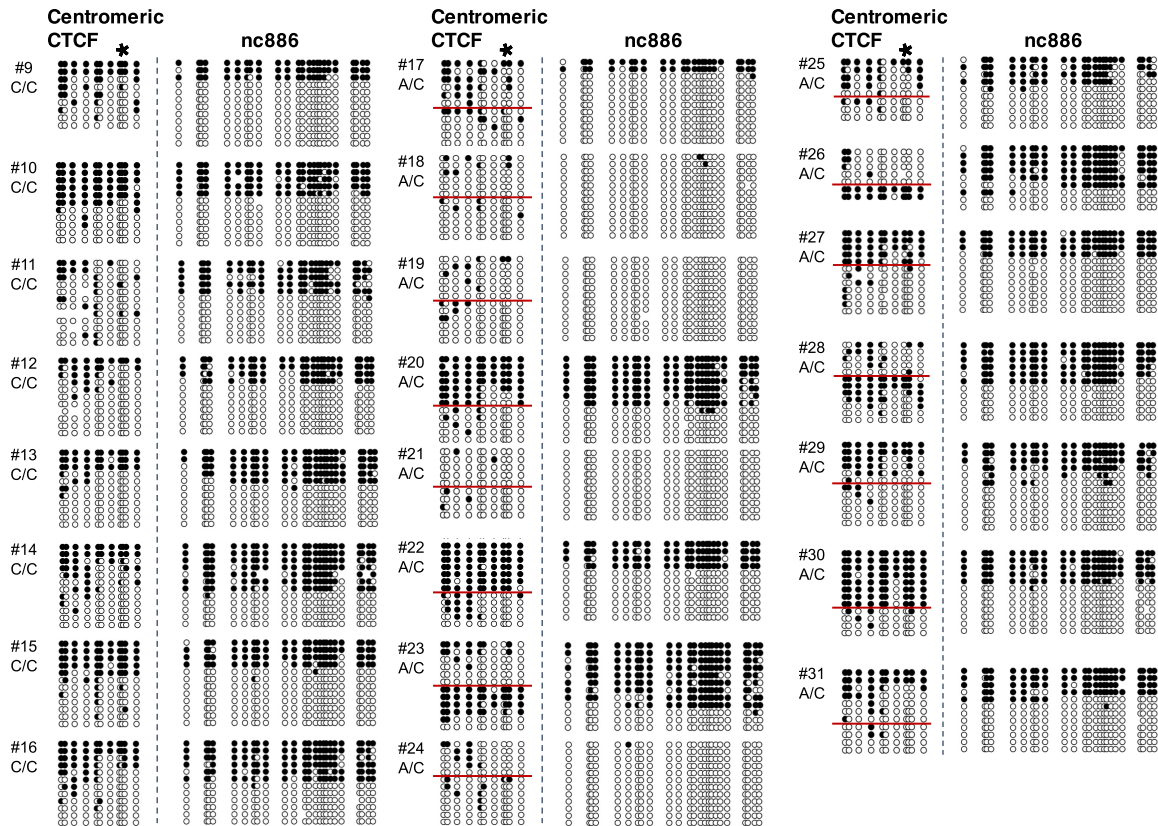

**Fig. S6. Bisulfite sequencing of centromeric CTCF and nc886.** Locus-specific bisulfite sequencing analysis for individuals not represented in Figs. 2. Clones for centromeric CTCF are not physically connected on an individual DNA strand. Clones for heterozygous individuals are sorted first by A/C and then by decreasing amount methylation at the centromeric CTCF. Clones for homozygous individuals and all individuals at nc886 are sorted by decreasing amount of methylation.

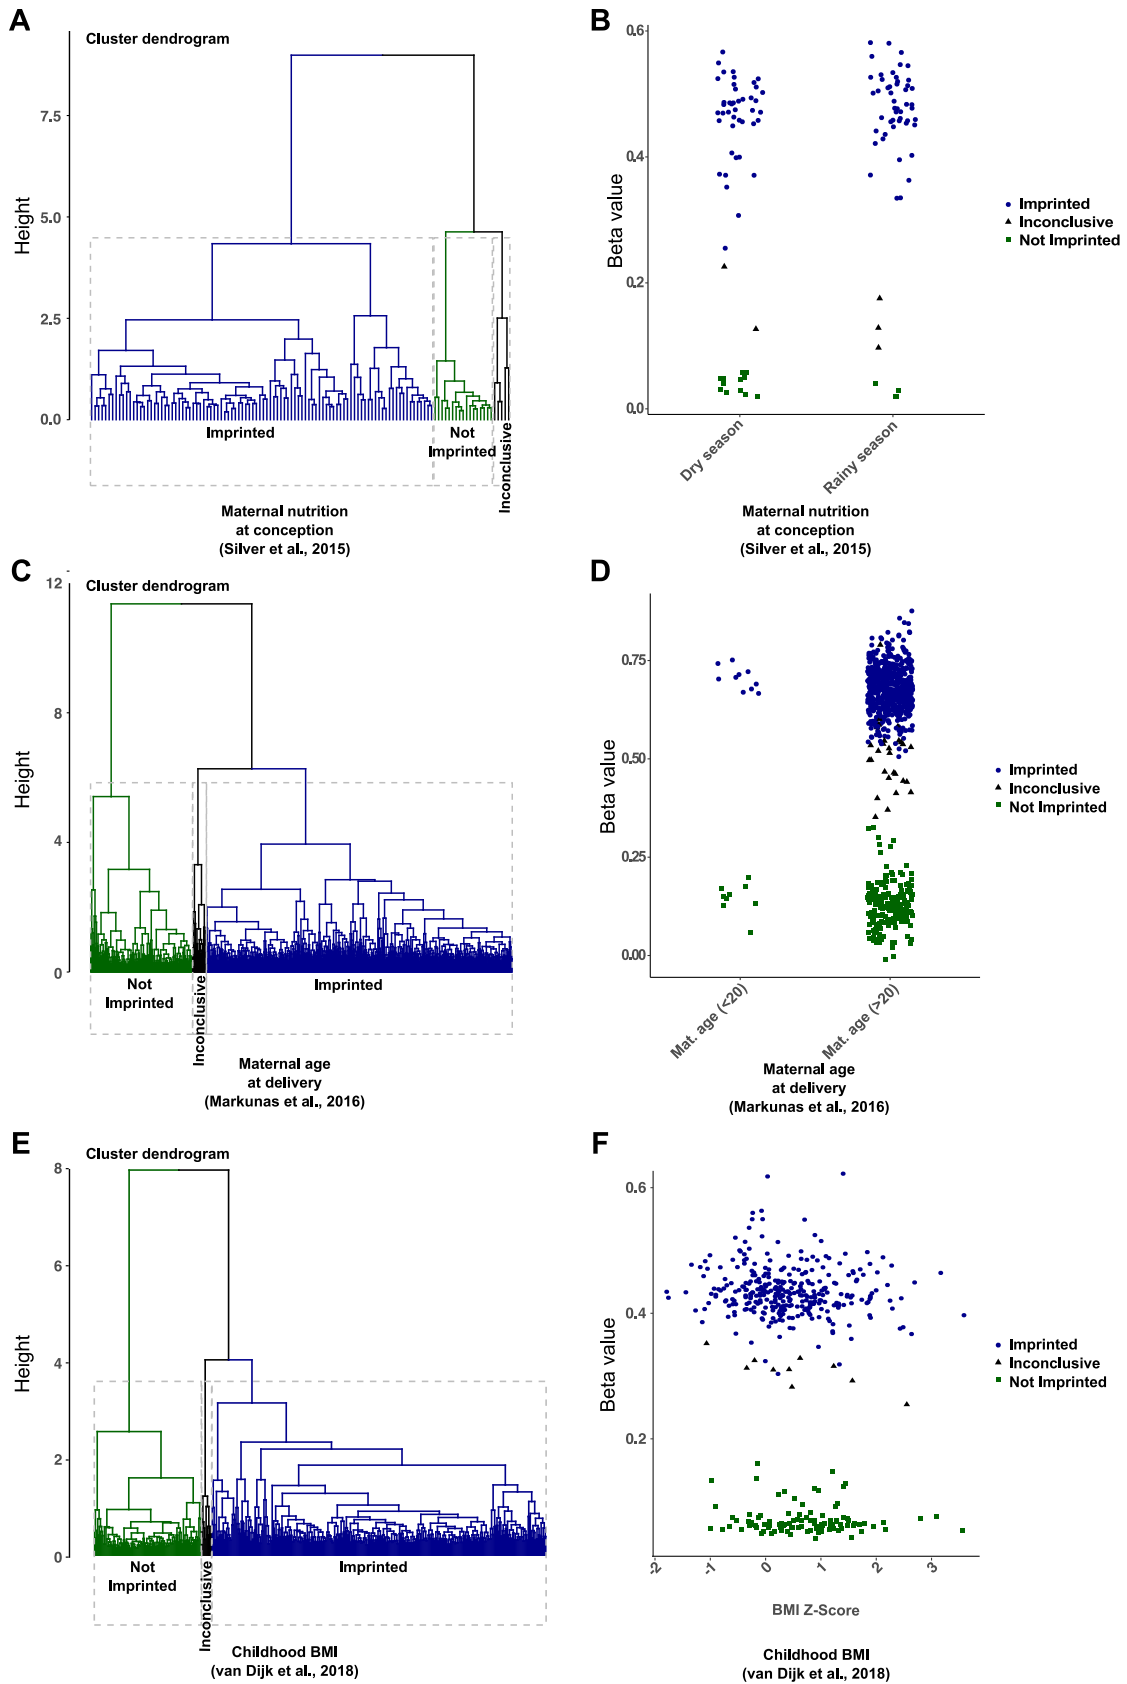



**Fig. S7. Hierarchical clustering of beta values in the nc886 DMR.** A) Cluster dendrogram for data from GSE59592 based on beta values in the nc886 DMR. B) Individuals are grouped by dry or rainy season of conception, and beta values for cg04481923 are plotted. The imprinted, not imprinted, and inconclusive groups are based on the cluster dendrogram from panel A. C) Clustering analysis was performed as for panel A, using data from GSE82273. D) Individuals are grouped by age (< 20 years and > 20 years), and beta values for cg04481923 are plotted. The imprinted, not imprinted, and inconclusive groups are based on the cluster dendrogram in panel C. E) Clustering analysis was performed as for panel A, using data from GSE103657. F) Individuals are plotted by BMI measurement from the DOMInO study and beta values for cg04481923 are plotted. The imprinted, not imprinted, and inconclusive groups are based on the cluster dendrogram in panel E. When we performed the analyses including the “inconclusive” group we find that season of conception is sensitive to this inclusion ( $P = 0.096$ ); beta regression estimated the odds ratio for rainy season being methylated at the nc886 probe versus the dry season as 1.395 ( $P = 0.0322$ ). Maternal age and BMI were not sensitive to inclusion of the “inconclusive” group ( $P = 0.0289$  and  $P = 2.22 \times 10^{-3}$  respectively).

| <b>H19</b> | <b>PEG3</b> | <b>nc886</b> |
|------------|-------------|--------------|
| cg16675558 | cg22220806  | cg16402696   |
| cg03996735 | cg13946792  | cg17974054   |
| cg18104242 | cg15473155  | cg11852404   |
| cg27300742 | cg19041006  | cg16684184   |
| cg25281616 | cg17663463  | cg00308130   |
| cg01895612 | cg19771589  | cg15837280   |
| cg23476401 | cg02793099  | cg07158503   |
| cg00237904 | cg01656470  | cg04515200   |
| cg06765785 | cg27519373  | cg13581155   |
| cg25821896 | cg07310951  | cg11978884   |
| cg18454954 | cg02478023  | cg11608150   |
| cg25579157 | cg22354595  | cg06478886   |
| cg02886509 | cg19335327  | cg04481923   |
| cg02657360 | cg14849423  | cg18678645   |
| cg16574793 | cg15777825  | cg06536614   |
| cg09452478 | cg10204755  | cg26328633   |
| cg20891060 | cg12205903  | cg25340688   |
| cg20049005 | cg26349266  | cg26896946   |
| cg19462210 | cg02162069  | cg00124993   |
| cg00220736 | cg13960339  | cg08745965   |
|            | cg13369939  | cg16615357   |
|            | cg20628335  | cg18797653   |
|            | cg22294267  | cg12897067   |
|            | cg19098268  | cg05631625   |
|            | cg24844423  |              |
|            | cg15678121  |              |
|            | cg25458871  |              |
|            | cg18668753  |              |
|            | cg18706888  |              |
|            | cg06652523  |              |
|            | cg01054891  |              |
|            | cg13374648  |              |
|            | cg26917367  |              |
|            | cg22927979  |              |

**Table S1.** Infinium HM450 probe IDs used to analyze DNA methylation across a paternally methylated DMR (H19), a maternally methylated DMR (PEG3) and a polymorphically imprinted DMR (nc886). Probe IDs correspond to heat maps in Figure 1.

| Study                    | Index SNP                           | Tissue Investigated   | # of Informative Individuals | Conclusion                                                     |
|--------------------------|-------------------------------------|-----------------------|------------------------------|----------------------------------------------------------------|
| Paliwal et al., 2013     | rs2346019                           | Placenta              | 10                           | Allele specific DNA methylation of nc886 is maternally derived |
| Treppendahl et al., 2012 | rs9327740                           | Peripheral Blood      | 1                            | Allele specific DNA methylation of nc886 is maternally derived |
| Romanelli et al., 2014   | rs2346018<br>rs2346019<br>rs9327740 | Placenta & Cord Blood | 6                            | nc886 is a maternally methylated DMR                           |

**Table S2.** Published studies concluding that DNA methylation of the nc886 DMR is maternally derived.
